# Supplementary material for: Factors affecting the seasonal distribution and biomass of E. pacifica and T. spinifera along the Pacific coast of Canada: A spatiotemporal modelling approach
Source: PLoS One. 2021 May 14;16(5):e0249818. doi: 10.1371/journal.pone.0249818 (PMC8121349; doi:10.1371/journal.pone.0249818)
Supplement: S1 File — (DOCX) [file pone.0249818.s001.docx]

**Supplementary Methods**

As outlined in the main text, models are geostatistical and based on a stochastic partial differential equations (SPDE) mesh. The mesh generated for these models included 200 knots for all models, including null, depth-time only and full models (see Table 1). The general model form can be represented as

where represents the observed biomass density at a point in space and time . The index represents a month. The symbol represents the mean and and represent the Tweedie power and dispersion parameters. The symbol represent a vector of predictors for that location in time and represents a corresponding vector of coefficients; many of the coefficients correspond to basis functions from the smooth terms. The symbol represent spatiotemporal random effects drawn from Gaussian Markov random fields with covariance matrices and . The spatiotemporal random fields are allowed to follow a first order autoregressive structure (AR1) by month. The marginal standard deviation of is defined as.
